# Supplementary material for: Multi-receptor whole-cortex adaptations with long-term opioid use in chronic pain
Source: Research Square preprint supplement (doi:10.21203/rs.3.rs-5061297/v1), 2024-10-02
Supplement: Supplementary file 1 [file 5919eff4f8142611d24d9a4f.docx]

**Multi-receptor whole-cortex adaptations with long-term opioid use in chronic pain**

Marwan N Baliki 1, 4, 7, Andrew D. Vigotsky 1, 5, Gaelle Rached 1, 2, Rami Jabakhanji 1, 2, Lejian Huang 1, 2, Paulo Branco 1, 2, 3, Joana Barroso 1, 2, 3, Olivia Cong 1,2, Maria Centeno 1,2, Sam Cermak 1,2, James Griffith 1,6, Ajay D. Wasan 8, Thomas J. Schnitzer 1, 3, 4, A. Vania Apkarian 1, 2, 3, 4

1 Center for Translational Pain Research, 2 Department of Neuroscience, 3 Department of Anesthesia, 4 Physical Medicine and Rehabilitation, 5 Biomedical Engineering and Statistics & Data Science, 6 Medical and Social Sciences, Northwestern University, Chicago, Illinois; 8 Shirley Ryan Ability Lab, Chicago, Illinois. 9 Department of Anesthesiology and Perioperative Medicine, School of Medicine, University of Pittsburgh, Pittsburgh, Pennsylvania.

**Author affiliations**

1 Center for Translational Pain Research, Northwestern University, Chicago, IL 60611, USA

2 Department of Neuroscience, Northwestern University, Chicago, IL 60611, USA

3 Department of Anesthesia, Northwestern University, Chicago, IL 60611, USA

4 Department of Physical Medicine and Rehabilitation, Northwestern University, Chicago, IL 60611, USA

5 Biomedical Engineering and Statistics & Data Science, Northwestern University, Chicago, IL 60611, USA

6 Medical and Social Sciences, Northwestern University, Chicago, IL 60611, USA

7 Shirley Ryan AbilityLab, Chicago, IL 60611, USA

8 Department of Anesthesiology and Perioperative Medicine, School of Medicine, University of Pittsburgh, Pittsburgh, Pennsylvania, USA

**Supplementary Tables 1-18, figures 1-6.**

|  | **CBP-O (n=70)**  mean ± s.d. | **CBP+O (n=70)**  mean ± s.d. | **p-value** |
| --- | --- | --- | --- |
| ***Demographic and general health characteristics*** | | | |
| Age (years) | 59.87 ± 11.97 | 60.10 ± 10.50 | 0.87 |
| Sex/female (%) | 46 (65.71%) | 46 (65.71%) | 1 |
| Alcohol (%) | 46 (65.71%) | 33 (47.14%) | 0.06 |
| Smoking (%) | 13 (18.57%) | 15 (21.42%) | 0.90 |
| Race  White | 41 (58.57%) | 45 (64.29%) | 0.47 |
| Black | 15 (21.43%) | 23(32.86%) | 0.23 |
| Other/Undisclosed | 14 (20.00%) | 2 (2.86%) | 0.01 |
| BMI | 30.12 ± 5.21 | 31.16 ± 7.36 | 0.35 |
| MQS | 10.33 ± 7.56 | 20.53 ± 12.35 | <10-5 |
| ***Pain characteristics*** | | | |
| Pain intensity (NRS) | 5.34 ± 2.13 | 5.40 ± 1.94 | 0.87 |
| Pain duration (years) | 16.64 ± 19.16 | 17.21± 12.36 | 0.68 |
| ***Opioid consumption and behavior*** |  |  |  |
| MME | -- | 41.41 ± 70.06 |  |
| ROE (mg/L) | -- | 0.0042 ± 0.009 |  |
| Duration of opioid use (years) | -- | 7.80 ± 6.09 |  |
| SOWS |  | 8.83 ± 8.27 |  |
| COMM | -- | 7.17 ± 6.10 |  |

**Table S1. Patient demographics and general health.**

CBP+O and CBP-O patients were matched one-to-one between 70 CBP+O and a select 70 of 150 CBP-O, for age, sex, alcohol use, cigarette smoking, and BMI (two-tailed unpaired *t*-tests or chi-square tests were performed). They were also matched for pain intensity and duration. Opioid consumption was quantified using the daily prescription converted into MME, the blood levels of opioids converted to an ROE (mg/L), and the duration of opioid use in years. On average, CBP+O exhibited low opioid use (MME < 50) and high non-opioid medication use compared to CBP-O. On average opioid blood concentrations were 10 times lower than those usually observed in heroine misuse (around 0.05 mg/L) and more than 25 times less than those detected in heroin overdose death (>0.1 mg/L). The CBP+O patient with the highest opioid blood level displayed a ROE value of 0.048 mg/L that corresponded to the second highest MME value of 210. The overall low opioid use in our patients was consistent with the observed low withdrawal symptoms (SOWS) and misuse (COMM). There was no relationship between pain duration and duration of opioid use in CBP+O. Data presented as mean ± s.d. BMI = body mass index; MQS = medication quantification scale. NRS = numerical rating scale; MME = daily morphine milligram equivalent; ROE = relative opioid equivalent. SOWS = subjective opioid withdrawal scale; COMM = current opioid misuse measurement.

|  | **CBP-O (n=70)**  mean ± s.d. | **CBP+O (n=70)**  mean ± s.d. | **t-score (p-value)** |
| --- | --- | --- | --- |
| ***PainDETECT*** | 11.78 ± 7.56 | 15.06 ± 7.53 | -2.57 (0.01) |
| ***MPQ sensory*** | 11.48 ± 6.84 | 14.87 ± 6.75 | -2.94 (<10-2) |
| ***MPQ affect*** | 2.89 ± 2.67 | 3.81 ± 3.33 | -1.82 (0.07) |
| ***PCS*** | 13.27 ± 10.09 | 14.53 ± 11.50 | -0.68 (0.49) |
| ***ODI*** | **30.22 ± 13.02** | **41.42 ± 13.17** | **-5.06 (<10-5) *** |
| ***PROMIS function*** | **41.12 ± 6.51** | **36.59 ± 5.72** | **4.35 (<10-5) *** |
| ***PROMIS anxiety*** | 50.71 ± 8.77 | 50.72 ± 8.89 | -0.01 (0.99) |
| ***PROMIS depression*** | 47.64 ± 7.89 | 48.93 ± 8.52 | -0.94 (0.35) |
| ***PROMIS fatigue*** | **51.44 ± 8.22** | **56.69 ± 8.30** | **-3.76 (<10-3) *** |
| ***PROMIS sleep dis*** | 53.21 ± 8.21 | 54.26 ± 10.35 | -0.67 (0.51) |
| ***PROMIS social act*** | **49.15 ± 8.70** | **43.82 ± 7.80** | **4.04 (<10-4) *** |
| ***PROMIS pain Int.*** | **58.98 ± 6.26** | **63.19 ± 5.61** | **-4.18 (<10-4) *** |
| ***SF12 physical*** | **37.93 ± 9.74** | **31.43 ± 8.49** | **4.21 (<10-4) *** |
| ***SF12 mental*** | 52.49 ± 8.57 | 48.46 ± 11.12 | 2.40 (0.02) |
| ***BDI*** | **5.97 ± 4.51** | **11.03 ± 7.76** | **-4.69 (<10-5) *** |
| ***PANAS positive*** | 32.28 ± 7.76 | 31.30 ± 7.91 | 0.73 (0.46) |
| ***PANAS negative*** | 16.52 ± 5.11 | 18.59 ± 6.08 | -2.17 (0.03) |

**Table S2. Differences in seventeen pain and mood scores between CBP+O and CBP-O patients.** In CBP+O as compared to CBP-O, all pain and mood measures tended towards or showed worse outcomes, and none indicated improvement. CBP+O and CBP-O patients showed significant differences across multiple emotional, functional and pain properties (two-tailed t-test, *p<0.05 Bonferroni corrected). MPQ = McGill Pain Questionnaire; PCS = Pain Catastrophizing Scale; ODI = Oswestry low back Disability Index; PROMIS =Patient-Reported Outcomes Measurement Information System, subscales are labeled, pain int. = pain interference; SF12 = Short Form quality of life scale; BDI = Becks Depression Inventory; PANAS = Positive and Negative Affect Schedule.

|  | **CBP (n=140)** | | | **CBP-O (n=70)** | | | **CBP+O (n=70)** | | |
| --- | --- | --- | --- | --- | --- | --- | --- | --- | --- |
|  | **PC1** | **PC2** | **PC3** | **PC1’** | **PC2’** | **PC3’** | **PC1’’** | **PC2’’** | **PC3’’** |
| PainDETECT | 0.22 | **0.77** | 0.08 | 0.13 | **0.82** | 0.15 | 0.31 | **0.70** | 0.07 |
| MPQ sensory | 0.16 | **0.88** | -0.01 | 0.05 | **0.91** | -0.05 | 0.23 | **0.81** | 0.05 |
| MPQ affect | -0.01 | **0.82** | 0.15 | -0.07 | **0.70** | 0.09 | 0.01 | **0.88** | 0.17 |
| PCS | 0.28 | 0.42 | **0.53** | 0.44 | 0.23 | **0.59** | 0.17 | **0.61** | 0.47 |
| ODI | **0.73** | 0.43 | 0.21 | **0.76** | 0.32 | 0.14 | **0.62** | 0.51 | 0.26 |
| PROMIS function | **-0.86** | -0.07 | -0.17 | **-0.84** | 0.19 | -0.04 | **-0.83** | -0.23 | -0.21 |
| PROMIS anxiety | 0.21 | 0.01 | **0.74** | 0.34 | -0.01 | **0.64** | 0.18 | 0.08 | **0.78** |
| PROMIS depression | 0.20 | 0.04 | **0.80** | 0.25 | -0.05 | **0.73** | 0.19 | 0.13 | **0.82** |
| PROMIS fatigue | **0.60** | 0.08 | 0.51 | **0.55** | -0.01 | 0.50 | **0.61** | 0.06 | 0.52 |
| PROMIS sleep dis | 0.42 | 0.05 | 0.49 | **0.53** | 0.06 | 0.49 | 0.44 | 0.01 | 0.48 |
| PROMIS social | **-0.81** | -0.06 | -0.38 | **-0.81** | 0.11 | -0.36 | **-0.78** | -0.16 | -0.35 |
| PROMIS pain Int. | **0.82** | 0.08 | 0.32 | **0.85** | -0.11 | 0.26 | **0.74** | 0.17 | 0.32 |
| SF12 physical | **-0.88** | -0.18 | -0.04 | **-0.88** | -0.14 | -0.03 | **-0.84** | -0.18 | -0.01 |
| SF12 mental | -0.05 | -0.26 | **-0.79** | 0.07 | 0.03 | **-0.81** | -0.08 | -0.34 | **-0.78** |
| BDI | 0.39 | 0.23 | **0.68** | 0.25 | 0.03 | **0.77** | 0.41 | 0.20 | **0.70** |
| PANAS positive | -0.18 | 0.15 | **-0.61** | -0.16 | 0.43 | **-0.43** | -0.19 | -0.02 | **-0.68** |
| PANAS negative | 0.11 | 0.45 | **0.67** | -0.01 | 0.36 | **0.70** | 0.20 | 0.45 | **0.67** |
| Eigen value | 4.34 | 2.80 | 4.19 | 4.52 | 2.55 | 3.95 | 4.01 | 3.10 | 4.39 |
| Prob Exp Variance | 0.26 | 0.16 | 0.25 | 0.27 | 0.15 | 0.23 | 0.24 | 0.18 | 0.26 |

**Table S3. Principal component analysis for all participants (CBP, n = 140), or when performed separately for each subgroup, CBP-O, and CBP+O.** Loading of all seventeen measurements on the principal components determined from all patients (PC1, PC2, PC3), CBP-O (PC1’, PC2’, PC3’) and CBP+O (PC1’’, PC2’’, PC3’’). Data from all patients, or separately for CBP+O and CBP-O, mapped to the same three principal components that represent functional disability (PC1), pain quality (PC2), and negative affect (PC3).


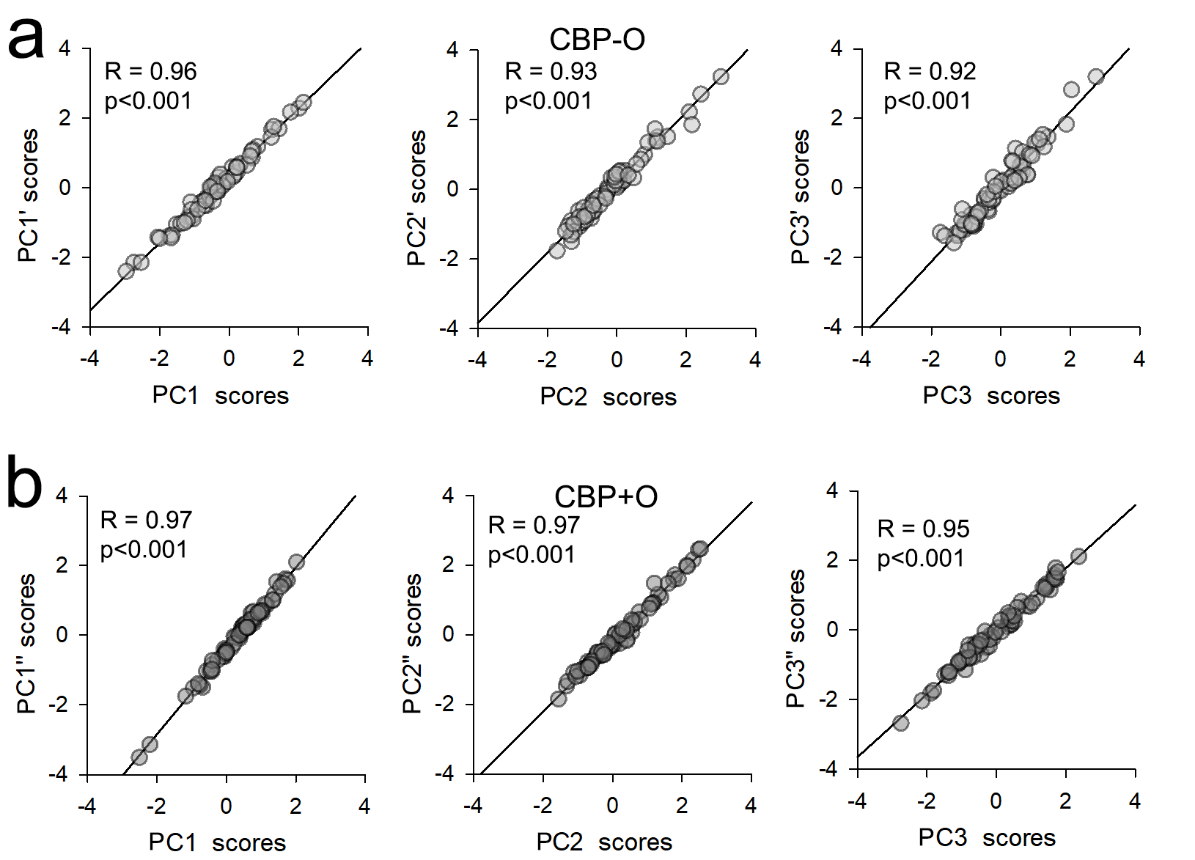


**Figure S1. Behavioral and clinical properties of CBP+O and CBP-O patients exhibited similar principal components decomposition. a.** Scatter plots show the relationship of principal components scores determined from CBP-O (PC1’, PC2’, PC3’) with component scores computed from all patients (PC1, PC2, PC3). **b.** Scatter plots show the relationship of principal component scores determined from CBP+O (PC1’’, PC2’’, PC3’’) with component scores computed from all patients (PC1, PC2, PC3). Overall, principal components computed from CBP-O and CBP+O showed similar scores to those computed from all patients (all R-values > 0.92; p<0.01).

|  | **PC1 (Functional disability)** | | | | **PC2 (Pain Quality)** | | | | **PC3 (Negative affect)** | | | |
| --- | --- | --- | --- | --- | --- | --- | --- | --- | --- | --- | --- | --- |
|  | **Beta** | **ηp2** | **F-value** | **P-value** | **Beta** | **ηp2** | **F-value** | **P-value** | **Beta** | **ηp2** | **F-value** | **P-value** |
| ***Opioid (CBP-O > CBP+O)*** | **-0.369** | **0.115** | **12.71** | **<10-3** | **-0.305** | **0.078** | **8.29** | **<10-2** | 0.060 | 0.003 | 0.26 | 0.61 |
| ***Sex (Male > Female)*** | -0.014 | 0.000 | 0.03 | 0.87 | -0.057 | 0.004 | 0.39 | 0.54 | 0.107 | 0.011 | 1.14 | 0.29 |
| ***Race (White > Black)*** | -0.007 | 0.000 | 0.01 | 0.94 | -0.015 | 0.000 | 0.03 | 0.87 | 0.081 | 0.006 | 0.64 | 0.43 |
| ***Age*** | 0.187 | 0.039 | 3.93 | 0.06 | -0.064 | 0.004 | 0.41 | 0.56 | **-0.236** | **0.048** | **4.99** | **0.03** |
| ***BMI*** | **0.247** | **0.068** | **7.16** | **0.01** | -0.007 | 0.000 | 0.00 | 0.94 | -0.124 | 0.014 | 1.42 | 0.24 |
| ***NRS*** | 0.148 | 0.026 | 2.62 | 0.11 | **0.372** | **0.140** | **15.90** | **<10-3** | -0.042 | 0.002 | 0.16 | 0.69 |
| ***Log Pain duration*** | -0.118 | 0.017 | 1.65 | 0.20 | 0.006 | 0.000 | 0.00 | 0.95 | -0.002 | 0.000 | 0.00 | 0.99 |
| ***MQS*** | 0.070 | 0.005 | 0.46 | 0.50 | -0.033 | 0.001 | 0.10 | 0.75 | 0.089 | 0.006 | 0.60 | 0.44 |

**Table S4. Analysis of covariance results for principal components with opioid use (CBP-O > CBP+O), demographics (sex, race, age, BMI), and pain parameters (NRS, Log Pain Duration, MQS).** Effect size and significance of opioid use, demographic and pain properties on clinical and behavioral components of CBP patients. Opioid use exacerbated functional disability (PC1) and pain quality (PC2).We also observe that PC1 is worsened with higher BMI, PC2 worsened with higher pain scores, and PC3 improved with age. These additional relationships are consistent with the labels we assign to the three PCs. Significance was determined using ANCOVA. Effect size was computed using partial eta-squared (**ηp2**). **ηp2**<0.05 indicates small effect size; 0.05< **ηp2**B<0.15 indicates medium effect size; **ηp2**> 0.15 indicates large effect size indicate small effect size BMI = body mass index; MQS = medication quantification scale. NRS = numerical rating scale.


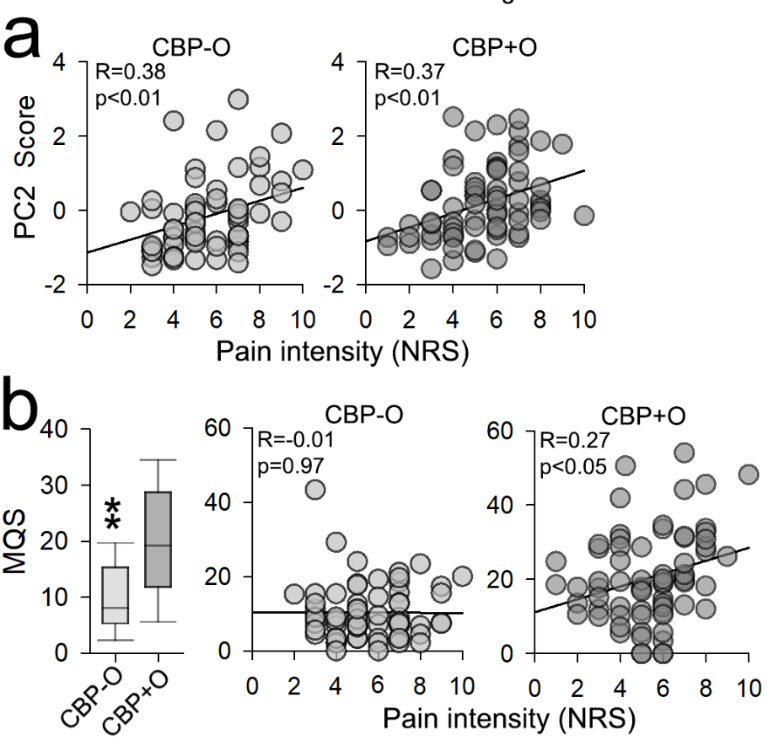


**Figure S2. Relationship of pain intensity with pain quality and with consumption of non-opioid medications, in CBP patients. a.** PC2 (Pain quality) showed a significant positive relationship with pain intensity for CBP+O and CBP-O patients. **b.** Compared to CBP-O, CBP+O patients showed increased consumption of non-opioid drugs as assessed using MQS (p<0.001). MQS was related to pain intensity in CBP+O group (p<0.01), but not in the CBP-O group (p=0.97). These results are informative since even when pain intensity and pain duration are matched between CBP+O and CBP-O, and even though the relationship between pain intensity and pain affect are very similar between the two groups, CBP+O consume more non-opioids in proportion to their pain. The latter provides indirect evidence that long-term opioid use exacerbates the affective component of back pain. Thus, demonstrating an opioid-induced hyper-affective state when pain intensity is matched between the groups, indirectly demonstrating the presence of opioid-induced hyperalgesia.MQS = medication quantification scale. NRS = numerical pain rating scale.


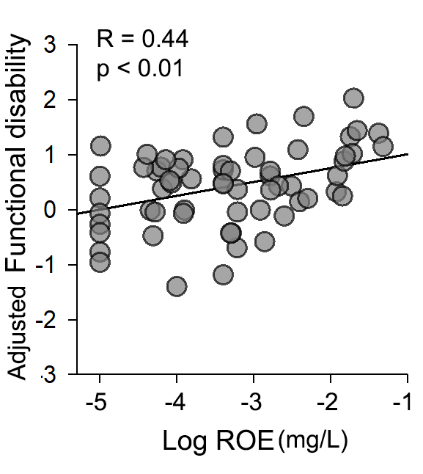


**Figure S3. Opioid blood level is positively associated with worse functional disability (PC1).** Opioid blood levels (ROE) showed a significant positive correlation and PC1 (functional disability) scores corrected for age, sex, NRS, pain duration, BMI, and MQS (p<0.01). BMI = body mass index; MQS = medication quantification scale. NRS = numerical pain rating scale. ROE = relative opioid equivalent in milligrams/liters

**
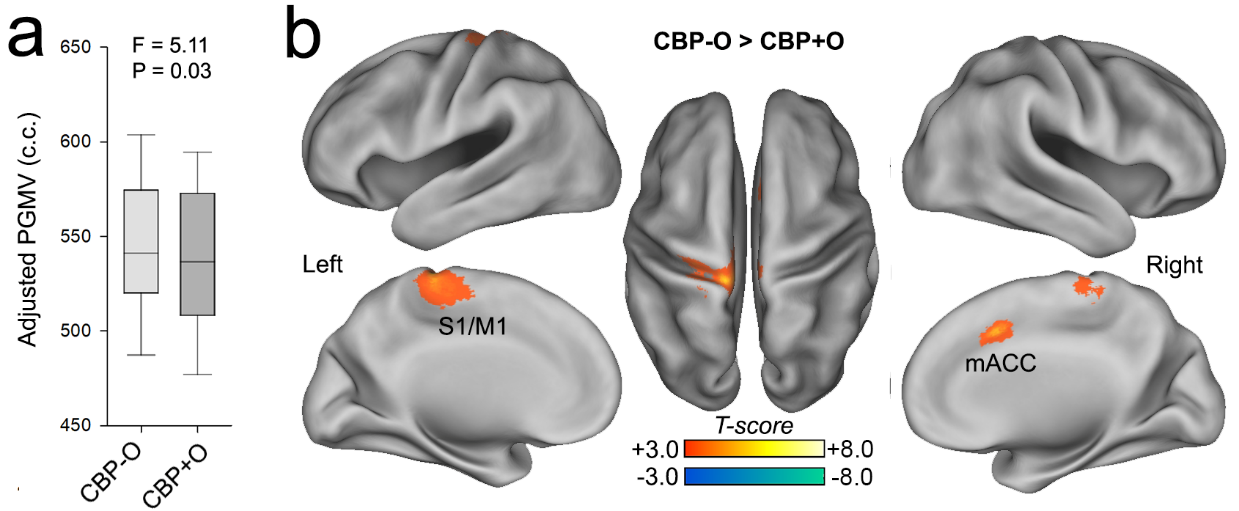
**

**Figure S4**. **Long-term opioid use was associated with lower global and local gray matter. a.** Peripheral gray matter volume (PGMV) was significantly less in CBP+O compared to CBP-O. **b.** CBP+O showed less gray matter density in S1/M1 and mACC (TFCC t-score > 2.3, p<0.01 corrected for multiple comparisons). PGMV = peripheral gray matter volume; S1/M1 = primary sensorimotor cortex; mACC = middle anterior cingulate cortex.

|  | **Peripheral gray matter volume** | | | |
| --- | --- | --- | --- | --- |
|  | **Beta** | **ηp2** | **F-value** | **P-value** |
| ***Opioid (CBP-O > CBP+O)*** | **0.196** | **0.036** | **5.07** | **0.03** |
| ***Sex (Male > Female)*** | **-0.264** | **0.084** | **6.64** | **0.01** |
| ***Race (White > Black)*** | -0.039 | 0.002 | 0.10 | 0.75 |
| ***Age (year)*** | **-0.388** | **0.152** | **19.08** | **<10-5** |
| ***BMI*** | -0.098 | 0.012 | 1.25 | 0.27 |
| ***NRS (0-10)*** | 0.079 | 0.008 | 0.63 | 0.43 |
| ***Log Pain duration (year)*** | 0.140 | 0.024 | 2.24 | 0.14 |
| ***MQS*** | -0.057 | 0.003 | 0.32 | 0.57 |

**Table S5. Analysis of covariance for peripheral gray matter volume with opioid use (CBP-O > CBP+O), demographics (sex, race, age, BMI), and pain (NRS, Log Pain Duration) parameters.** Effect size and significance of opioid use, demographic and pain properties on peripheral gray matter volume. Significance was determined using ANCOVA. Effect size was computed using partial eta-squared (**ηp2**).Long-term opioid use, older age, and females exhibited smaller gray matter volume. Relative to the effect size we observe for one year of aging, an average of 6 years of opioid consumption decreases gray matter volume by a magnitude equivalent to about 0.5 years of aging. **ηp2**<0.05 indicates small effect size; 0.05< **ηp2**B<0.15 indicates medium effect size; **ηp2**> 0.15 indicates large effect size. BMI = body mass index; MQS = medication quantification scale. NRS = numerical rating scale.

**Table S6. Peripheral gray matter volume in CBP+O (n = 70) does not depend on opioid consumption (MME), blood levels of opioids (ROE), duration of opioid use (DOU), signs of withdrawal (SOWS) or misuse (COMM), and clinical parameters (PC1-3).** Relationship between PGMV and clinical parameters were determined using a linear regression model. There were no significant associations between PGMV and clinical parameters. These results suggests that either gray matter volume is an indication of opioid use vulnerability or that it is a consequence of long-term adaptations that have become independent of clinical signs. With the current design, we cannot differentiate between these two options.Effect size was computed using partial eta-squared (**ηp2**). **ηp2**<0.05 indicates small effect size; 0.05< **ηp2** <0.15 indicates medium effect size; **ηp2**> 0.15 indicates large effect size indicates small effect size. MME = Morphine Milligram Equivalents; ROE = Relative Opioid Equivalent; DOU = duration of opioid use; SOWS = subjective opioid withdrawal scale; COMM = current opioid misuse measure.

|  | **Peripheral gray matter volume** | | | |
| --- | --- | --- | --- | --- |
|  | **Beta** | **ηp2** | **F-value** | **P-value** |
| ***Log MME*** | 0.12 | 0.01 | 0.34 | 0.56 |
| ***Log ROE*** | -0.18 | 0.03 | 0.80 | 0.38 |
| ***Log DOU*** | 0.20 | 0.05 | 1.50 | 0.23 |
| ***SOWS*** | -0.31 | 0.07 | 2.21 | 0.15 |
| ***COMM*** | -0.28 | 0.06 | 2.07 | 0.16 |
| ***PC1- Functional disability*** | 0.02 | 0.00 | 0.02 | 0.88 |
| ***PC2 – Pain quality*** | 0.12 | 0.02 | 0.49 | 0.49 |
| ***PC3 – Negative affect*** | 0.12 | 0.01 | 0.34 | 0.56 |

|  | **Opioid**  **(CBP-O > CBP+O)** | **Sex**  **(Females > Male)** | **Race**  **(Black > White)** | **Age (years)** | **BMI** | **Pain Intensity** | **Log**  **Pain duration** | **MQS** |
| --- | --- | --- | --- | --- | --- | --- | --- | --- |
| ***Right Thalamus*** | 3.78  -0.20  0.03 | 5.46  -0.21  0.05 | 0.58  -0.07  0.01 | 15.21  -0.37  0.13 | 0.81  -0.08  0.01 | 0.84  -0.08  0.01 | 0.40  0.05  0.01 | 3.43  -0.19  0.03 |
| ***Left Thalamus*** | 1.83  -0.13  0.02 | 5.46  0.20  0.05 | 0.26  0.05  0.00 | 24.19  -0.45  0.19 | 1.34  -0.10  0.01 | 3.25  -0.16  0.03 | 0.12  0.03  0.00 | 1.15  -0.10  0.01 |
| ***Right Caudate*** | 0.00  0.00  0.00 | 7.60  0.27  0.07 | 0.09  0.03  0.00 | 4.48  -0.22  0.04 | 2.04  -0.14  0.02 | 0.00  0.00  0.00 | 0.71  -0.08  0.01 | 0.04  -.02  0.00 |
| ***Left Caudate*** | 1.27  -0.12  0.02 | 4.50  0.18  0.04 | 0.22  0.04  0.00 | 6.71  -0.28  0.23 | 1.79  -0.12  0.01 | 0.81  -0.08  0.01 | 0.10  0.02  0.00 | 0.09  -0.09  0.00 |
| ***Right Putamen*** | 0.99  -0.11  0.01 | 20.79  0.33  0.11 | 0.14  -0.07  0.00 | 16.72  -0.36  0.14 | 0.58  0.04  0.00 | 0.61  -0.07  0.01 | 0.29  0.06  0.00 | 3.05  -0.18  0.03 |
| ***Left Putamen*** | 0.44  -0.06  0.00 | 20.65  0.37  0.18 | 0.37  -0.05  0.00 | 42.47  -0.56  0.30 | 0.03  0.01  0.00 | 3.42  -0.15  0.03 | 0.16  0.03  0.00 | 0.04  0.00  0.00 |
| ***Right Pallidum*** | 1.40  -0.12  0.01 | 1.55  0.11  0.01 | 0.06  -0.02  0.00 | 7.05  -0.26  0.07 | 1.58  0.12  0.02 | 0.07  -0.02  0.00 | 0.06  -0.02  0.00 | 8.78  -0.31  0.08 |
| ***Left Pallidum*** | 0.03  0.00  0.00 | 5.72  0.25  0.06 | 0.18  -0.09  0.01 | 3.06  -0.18  0.03 | 5.35  0.21  0.05 | 0.00  0.00  0.00 | 0.08  -0.02  0.00 | 5.46  -0.21  0.03 |
| ***Right Hippocampus*** | 0.36  -0.07  0.00 | 0.93  -0.09  0.01 | 0.32  -0.06  0.00 | 7.07  -0.27  0.07 | 0.40  -0.06  0.00 | 6.88  -0.25  0.07 | 1.17  -0.11  0.01 | 1.64  -0.14  0.02 |
| ***Left Hippocampus*** | 0.95  -0.08  0.00 | 1.71  -0.13  0.02 | 0.07  0.00  0.00 | 4.40  -0.19  0.04 | 0.00  0.00  0.00 | 3.29  -0.20  0.04 | 0.21  -0.04  0.00 | 0.36  -0.05  0.00 |
| ***Right Amygdala*** | 0.47  0.07  0.00 | 0.01  0.00  0.00 | 6.78  -0.26  0.65 | 0.11  -0.03  0.00 | 0.90  0.09  0.01 | 0.00  0.00  0.00 | 2.99  -0.17  0.03 | 0.16  -0.04  0.00 |
| ***Left Amygdala*** | 1.50  0.13  0.02 | 0.20  -0.04  0.00 | 2.47  -0.16  0.04 | 3.24  -0.17  0.03 | 1.64  0.14  0.02 | 2.57  -0.17  0.04 | 0.00  0.00  0.00 | 1.97  -0.15  0.03 |
| ***Right NAc*** | 3.02  -0.17  0.03 | 0.53  -0.06  0.01 | 0.07  -0.02  0.00 | 35.59  -0.53  0.27 | 0.11  -0.02  0.00 | 3.61  -0.18  0.05 | 0.00  0.00  0.00 | 0.51  -0.07  0.00 |
| ***Left NAc*** | 0.33  -0.05  0.00 | 1.42  0.12  0.02 | 0.08  -0.08  0.01 | 51.88  -0.60  0.31 | 0.02  0.00  0.00 | 1.72  -0.15  0.02 | 0.43  0.06  0.00 | 5.21  -0.20  0.03 |

**Table S7. Analysis of covariance for subcortical volumes with opioid use (CBP-O > CBP+O), demographics (sex, race, age, BMI), and pain parameters (intensity, duration, MQS).** Data presented as F-value/Beta/effect size (**ηp2**). Shaded cells represent significant effects (p<0.05). Subcortical regions showed no significant differences in volume between CBP+O and CBP-O patients. The important outcome is the lack of subcortical volume differences between CBP+O and CBP-O. Thalamus, caudate, and putamen showed lower volumes in females compared to males. Right hippocampus volume was negatively associated with pain intensity, while putamen volumes were negatively related to non-opioid medication use. The right amygdala showed lower volume in White compared to Black. Most regions exhibited decreased volume in relationship to age. **ηp2**<0.05 indicates small effect size; 0.05< **ηp2**B<0.15 indicates medium effect size; **ηp2**> 0.15 indicates large effect size. BMI = body mass index; MQS = medication quantification scale; NAc = nucleus accumbens.

|  | **Coordinates (mm)** | | | **Size**  **(voxels)** | **T-score** | **Associated terms (Neurosynth reverse inference)** |
| --- | --- | --- | --- | --- | --- | --- |
|  | x | y | z |
| ***CBP-O > CBP+O*** | | | | | | |
| ***mACC*** | 10 | 8 | 38 | 80 | 4.78 | Autonomic control, aversive, pain, noxious, arousal |
| ***Left S1/M1*** | -10 | -32 | 62 | 503 | 5.84 | Sensorimotor, motor function, movement, motor, motor imagery |

**Table S8. Regional decreases in gray matter density in patients on long-term opioid use.** Brain regions that showed significantly decreased gray matter density in CBP+O compared to CPB-O. Terms associated with brain regions were determined using reverse inference from Neurosynth. Coordinates in MNI space; mACC = middle anterior cingulate cortex; S1/M1 = primary sensorimotor cortex.


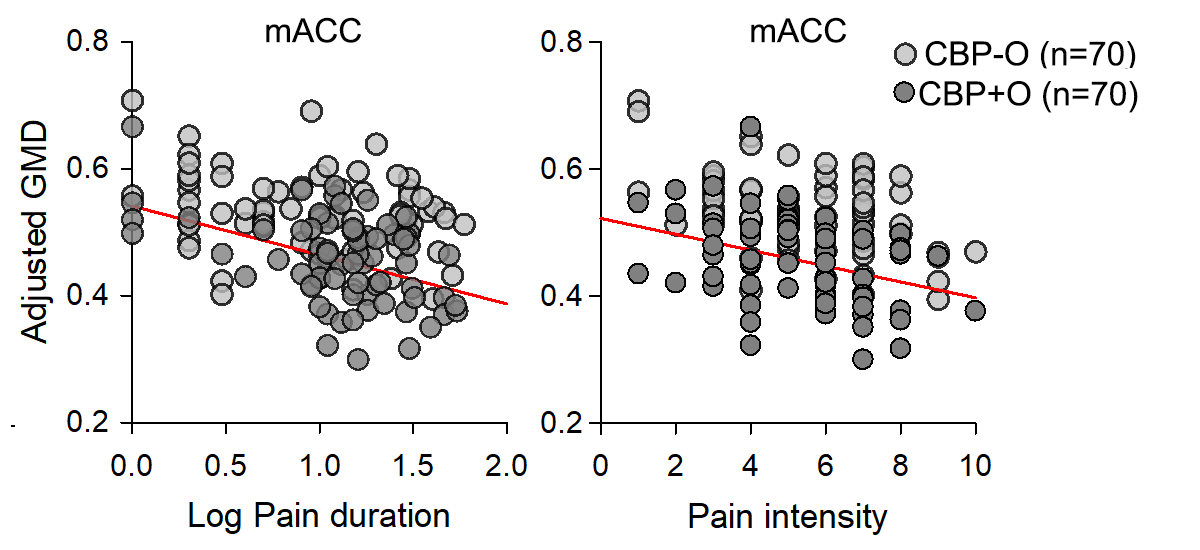


**Figure S5**. **Mid-anterior** **Cingulate Gray matter density was negatively associated with pain log pain duration and pain intensity, in both CBP+O and CBP-O groups.** Gray matter density in the mACC was significantly associated with pain duration (left scatter plot) and pain intensity (right scatter plot) in all CBP patients (Statistical significance is presented in **Extended data Table 9**). mACC = middle anterior cingulate cortex.

|  | **mACC** | | | | **S1/M1** | | | |
| --- | --- | --- | --- | --- | --- | --- | --- | --- |
|  | **Beta** | **ηp2** | **F-value** | **P-value** | **Beta** | **ηp2** | **F-value** | **P-value** |
| ***Opioid (CBP-O > CBP+O)*** | **0.572** | **0.270** | **36.25** | **<10-5** | **0.562** | **0.254** | **33.31** | **<10-5** |
| ***Sex (Male > Female)*** | -0.039 | 0.002 | 0.23 | 0.63 | -0.137 | 0.026 | 2.66 | 0.11 |
| ***Race (White > Black)*** | **0.190** | **0.050** | **5.18** | **0.03** | -0.097 | 0.013 | 1.28 | 0.26 |
| ***Age*** | -0.144 | 0.028 | 2.78 | 0.10 | -0.057 | 0.004 | 0.42 | 0.52 |
| ***BMI*** | -0.108 | 0.016 | 1.63 | 0.20 | -0.055 | 0.004 | 0.39 | 0.53 |
| ***NRS*** | **-0.196** | **0.053** | **5.51** | **0.02** | 0.068 | 0.006 | 0.63 | 0.43 |
| ***Log Pain duration*** | **-0.228** | **0.069** | **7.30** | **0.01** | 0.042 | 0.002 | 0.24 | 0.62 |
| ***MQS*** | 0.008 | 0.000 | 0.01 | 0.94 | 0.060 | 0.004 | 0.39 | 0.54 |

**Table S9. Analysis of covariance for cortical gray matter density changes (mACC, S1/M1) in patients on long-term opioid use with opioid use (CBP-O > CBP+O), demographics (sex, race, age, BMI), and pain (NRS, Pain duration, MQS) parameters.** Opioid use, race, pain intensity (NRS), and pain duration were correlated with mACC gray matter density decrease.

Only opioid use was correlated with S1/M1gray matter density decrease.Significance was determined using ANCOVA**.** Effect size was computed using partial eta-squared (**ηp2**). **ηp2**<0.05 indicates small effect size; 0.05< **ηp2** <0.15 indicates medium effect size; **ηp2**> 0.15 indicates large effect size; BMI = body mass index; MQS = medication quantification scale. NRS = numerical rating scale. mACC = middle anterior cingulate cortex. S1/M1 = primary sensorimotor cortex

|  | **mACC** | | | | **S1/M1** | | | |
| --- | --- | --- | --- | --- | --- | --- | --- | --- |
|  | **Beta** | **ηp2** | **F-value** | **P-value** | **Beta** | **ηp2** | **F-value** | **P-value** |
| ***Log MME*** | 0.13 | 0.01 | 0.39 | 0.54 | 0.04 | 0.00 | 0.04 | 0.85 |
| ***Log ROE*** | -0.23 | 0.04 | 1.23 | 0.28 | 0.14 | 0.01 | 0.40 | 0.53 |
| ***Log DOU*** | 0.06 | 0.00 | 0.15 | 0.70 | -0.05 | 0.00 | 0.08 | 0.78 |
| ***SOWS*** | 0.02 | 0.00 | 0.01 | 0.93 | 0.16 | 0.02 | 0.51 | 0.48 |
| ***COMM*** | 0.05 | 0.00 | 0.07 | 0.79 | -0.07 | 0.00 | 0.12 | 0.73 |
| ***PC1- Functional disability*** | -0.09 | 0.01 | 0.32 | 0.58 | 0.01 | 0.00 | 0.01 | 0.94 |
| ***PC2 – Pain quality*** | 0.12 | 0.02 | 0.49 | 0.49 | -0.19 | 0.03 | 1.05 | 0.31 |
| ***PC3 – Negative affect*** | -0.31 | 0.08 | 2.59 | 0.12 | 0.05 | 0.00 | 0.07 | 0.80 |

**Table S10. We observe no relationship between gray matter density for regions decreased in CBP+O (mACC, S1/M1) with opioid use measures (MME, ROE, DOU), clinical parameters (SOWS, COMM), and principal components (PC1-3) in CBP+O patients.** Effect size was computed using partial eta-squared (**ηp2**). **ηp2**<0.05 indicates small effect size; 0.05< **ηp2** <0.15 indicates medium effect size; **ηp2**> 0.15 indicates large effect size. All regressions were performed after correcting for age, sex, race, BMI, and MQS effects. MME = Morphine Milligram Equivalents; ROE = Relative Opioid Equivalent; DOU = duration of opioid use; SOWS = subjective opioid withdrawal scale; COMM = current opioid misuse measure.

|  | **Coordinates (mm)** | | | **Size**  **(voxels)** | **T-score** | **Associated terms (Neurosynth reverse inference)** |
| --- | --- | --- | --- | --- | --- | --- |
|  | x | y | z |
| ***Regions that exhibited increased ALFF in CBP+O (CBP+O > CBP-O)*** | | | | | | |
| ***right pITG*** | 56 | -50 | -8 | 325 | 4.01 | Expression, facial, response time, perception, threating |
| ***left pITG*** | -54 | -50 | -14 | 410 | 4.22 | Words, form, visual words, subsequent memory, orthographic |
| ***mPFC*** | 4 | 60 | 2 | 823 | 6.01 | Autobiographical, default-mode, cognitive, intention |
| ***right LOC*** | 26 | -64 | 52 | 910 | 5.45 | Attention, spatial, calculation, rotation, orientation |
| ***MCL*** | 2 | 20 | -10 | 5050 | 7.89 | Reward, value, motivation, monetary, incentive |
| *right NAC* | 8 | 10 | -8 | 164 | 7.13 |  |
| *left NAc* | -10 | 10 | -10 | 162 | 7.05 |  |
| *sgACC* | 2 | 24 | -14 | 516 | 6.85 |  |
| *aACC* | -2 | 34 | -4 | 404 | 6.11 |  |
| *right Amyg* | 18 | -2 | -18 | 44 | 4.01 |  |
| *left Amyg* | -20 | -2 | -20 | 28 | 3.79 |  |
| *Brainstem* | -2 | -26 | -8 | 86 | 3.25 |  |
| ***Regions that exhibited decreased ALFF in CBP+O (CBP+O < CBP-O)*** | | | | | | |
| ***right aMTG*** | 54 | -8 | -20 | 1275 | -6.58 | Mind, mental states, theory, social, experiences |
| ***left aMTG*** | -54 | -8 | -22 | 1309 | -6.94 | Semantic, sentences, mentalizing, linguistic, theory of mind |
| ***left dlPFC*** | -46 | 24 | 22 | 3955 | -5.08 | Language, phonological, syntactic, verb, demands |
| *left IFG* | -50 | 15 | 6 | 1478 | -5.06 |  |
| *left MFG* | -42 | 30 | 32 | 2040 | -5.02 |  |

**Table S11. Regional ALFF changes in patients on long-term opioid use.** The table shows Coordinates in mm (MNI space), cluster size and T-score of brain regions that showed significant differences in ALFF between CBP+O and CBP-O (Threshold free Cluster corrected, T-score > 2.3, p < 0.01). The local coordinates, sizes, and T-scores for distinct subregions within the MCL and dlPFC clusters are shown. The top 5 associated terms with any given cluster were determined using reverse inference from Neurosynth. ALFF = Amplitude of low frequency fluctuations; pITG = posterior inferior temporal gyrus; MCL = meso-cortical limbic. mPFC = middle prefrontal cortex; LOC = Lateral occipital cortex; aMTG = anterior middle temporal gyrus; dlPFC = dorsolateral prefrontal cortex. Amyg = amygdala; NAc = Nucleus accumbens; sgACC = subgenual division of anterior cingulate cortex; aACC = anterior division of division of anterior cingulate cortex; IFG = Inferior frontal gyrus; MFG = Middle frontal gyrus.

|  | **Log MME**  R-value  (P-value) | **Log ROE**  R-value  (P-value) | **Log DOU**  R-value  (P-value) | **SOWS**  R-value  (P-value) | **COMM**  R-value  (P-value) | **PC1**  R-value  (P-value) | **PC2**  R-value  (P-value) | **PC3**  R-value  (P-value) |
| --- | --- | --- | --- | --- | --- | --- | --- | --- |
|  |
| ***Regions that exhibited increased ALFF (CBP+O > CBP-O)*** | | | | | | | | |
| ***right pITG*** | 0.13 (0.33) | -0.05 (0.69) | -0.17 (0.19) | 0.08 (0.52) | -0.04 (0.76) | 0.10 (0.40) | -0.02 (0.85) | 0.12 (0.37) |
| ***left pITG*** | 0.04 (0.76) | 0.03 (0.79) | -0.15 (0.26) | -0.03 (0.79) | 0.11 (0.40) | 0.20 (0.10) | 0.06 (0.64) | 0.11 (0.39) |
| ***mPFC*** | -0.05 (0.67) | -0.07 (0.60) | -0.09 (0.50) | 0.04 (0.76) | 0.08 (0.52) | 0.08 (0.52) | 0.08 (0.53) | 0.15 (0.26) |
| ***right LOC*** | 0.21 (0.09) | 0.22 (0.08) | -0.05 (0.68) | 0.11 (0.39) | 0.13 (0.35) | 0.10 (0.41) | 0.10 (0.40) | 0.01 (0.93) |
| ***MCL*** | 0.12 (0.38) | 0.01 (0.97) | -0.04 (0.74) | 0.10 (0.40) | -0.04 (0.76) | 0.16 (0.27) | 0.05 (0.68) | 0.14 (0.29) |
| ***Regions that exhibited decreased ALFF (CBP+O < CBP-O)*** | | | | | | | | |
| ***right aMTG*** | -0.15(0.28) | -0.03 (0.81) | 0.02 (0.89) | 0.14 (0.30) | -0.02 (0.86) | -0.04 (0.76) | 0.01 (0.94) | 0.02 (0.86) |
| ***left aMTG*** | -0.02 (0.86) | 0.08 (0.52) | -0.01 (0.93) | 0.07 (0.59) | 0.07 (0.59) | -0.07 (0.59) | 0.06 (0.69) | 0.06 (0.69) |
| ***left dlPFC*** | -0.22 (0.08) | -0.02 (0.88) | -0.01 (0.93) | -0.04 (0.74) | 0.02 (0.87) | -0.13 (0.33) | -0.19 (0.10) | 0.04 (0.76) |

**Table S12. Brain regional activity (ALFF) changes between CBP+O and CBP-O were not correlated with opioid use (MME, ROE, DOU), clinical parameters (SOWS, COMM), and characteristics of back pain (PC1-3), in CBP+O patients.** Data show the correlation of ALFF with MME, ROE, DOU, COMM, SOWS, PC1-functional disability, PC2-pain quality, and PC3-negative affect of for regions that showed significant ALFF differences between CBP+O and CBP-O. ALFF values were corrected for age, sex, race, pain intensity, BMI and MQS prior to correlation. ALFF = Amplitude of low-frequency fluctuations; pITG = posterior inferior temporal gyrus; MCL = meso-cortical limbic; mPFC = middle prefrontal cortex; LOC = Lateral occipital cortex; aMTG = anterior middle temporal gyrus; dlPFC = dorsolateral prefrontal cortex. MME = Morphine Milligram Equivalents; ROE = Relative Opioid Equivalent; DOU = duration of opioid use; SOWS = subjective opioid withdrawal scale; COMM = current opioid misuse measure.

|  | **High MME (n=12)**  mean ± s.d. | **Low MME (n=12)**  mean ± s.d. | **p-value** |
| --- | --- | --- | --- |
| ***Demographic and general health characteristics*** | | | |
| Age (years) | 56.58 ± 11.39 | 58.00 ± 7.15 | 0.72 |
| Sex/female (%) | 4 (33.33%) | 4 (33.33%) | 1 |
| BMI | 29.35 ± 6.42 | 31.05 ± 5.91 | 0.54 |
| ***Pain characteristics*** | | | |
| Pain intensity (NRS) | 5.75 ± 2.09 | 5.00 ± 1.81 | 0.45 |
| Pain duration (years) | 14.33 ± 8.47 | 19.67± 14.67 | 0.29 |
| ***Opioid consumption and behavior*** |  |  |  |
| MME | 136.14 ± 70.29 | 14.69 ± 9.54 | <10-3 |
| ROE (mg/L) | 0.014 ± 0.02 | 0.0017 ± 0.004 | <10-2 |
| Duration of opioid use (years) | 8.50 ± 6.59 | 8.42 ± 7.84 | 0.98 |
| SOWS | 15.17 ± 11.15 | 8.83 ± 10.74 | 0.17 |
| COMM | 11.00 ± 6.64 | 6.00 ± 4.89 | 0.06 |

**Table S13. Patient demographics and general health for high and low MME groups.** Patients on high opioids (n =12) and low opioid (n =12) were matched one-to-one for age, sex, and BMI (two-tailed unpaired *t*-tests or chi-square tests were performed). They were also matched for pain intensity and duration. Opioid consumption was quantified using the daily prescription converted into MME, the blood levels of opioids converted to an ROE (mg/L), and the duration of opioid use in years. On average opioid daily consumption and blood concentrations were 10 times lower in patients on low opioids compared to those on high opioids. Both groups had similar duration of opioid use. Patients on high opioids showed slightly higher withdrawal symptoms (SOWS) and misuse (COMM). BMI = Body Mass Index; MME = Morphine Milligram Equivalents; ROE = Relative Opioid Equivalent; DOU = duration of opioid use; SOWS = subjective opioid withdrawal scale; COMM = current opioid misuse measure.

|  | **CBP+O (MME>=50)**  (mean ± s.d.) | **CBP+O (MME<50)**  (mean ± s.d.) | **T-value** | **p-value** |
| --- | --- | --- | --- | --- |
|  |
| ***Regions that exhibited increased ALFF (CBP+O > CBP-O)*** | | | | |
| ***right pITG*** | 1.04 ± 0.02 | 1.03 ± 0.02 | 0.32 | 0.752 |
| ***left pITG*** | 1.07 ± 0.03 | 1.07 ± 0.03 | -0.17 | 0.867 |
| ***mPFC*** | 0.98 ± 0.02 | 1.00± 0.02 | -1.46 | 0.146 |
| ***right LOC*** | 1.04 ± 0.03 | 1.03 ± 0.02 | 1.29 | 0.199 |
| ***MCL*** | 1.03 ± 0.02 | 1.04 ± 0.03 | -1.02 | 0.318 |
| ***Regions that exhibited decreased ALFF (CBP+O < CBP-O)*** | | | | |
| ***right aMTG*** | 0.99 ± 0.02 | 0.98± 0.02 | 0.05 | 0.996 |
| ***left aMTG*** | 0.98 ± 0.02 | 0.97± 0.01 | 1.33 | 0.187 |
| ***left dlPFC*** | 0.97 ± 0.02 | 0.96 ± 0.02 | 0.763 | 0.448 |

**Table S14. Regional activity (ALFF) changes in CBP+O did not differ between low (MME<50) and high (MME>50) opioid consumption.** Data show differences in ALFF ROI between CBP+O patients with high MME (MME >= 50) and those with low MME (MME < 50). There were no differences between groups for all regions examined. ALFF = Amplitude of low-frequency fluctuations; pITG = posterior inferior temporal gyrus; mPFC = middle prefrontal cortex; LOC = Lateral occipital cortex; aMTG = anterior middle temporal gyrus; dlPFC = dorsolateral prefrontal cortex. MME = Morphine Milligram Equivalents; ROE = Relative Opioid Equivalents; BMI = body mass index; MQS = medication quantification scale.

|  | **Baseline**  (mean ± s.e.m.) | **Abstinence**  (mean ± s.e.m) | **T-value** | **p-value** |
| --- | --- | --- | --- | --- |
|  |
| ***Log ROE*** | -3.42 ± 0.51 | -4.51 ± 0.29 | 4.57 | <0.001 |
| ***Pain intensity (NRS)*** | 5.07 ± 0.51 | 5.28 ± 0.79 | -0.42 | 0.68 |
| ***SOWS*** | 6.14 ± 1.22 | 7.57 ± 0.03 | -2.16 | <0.05 |

**Table S15. Behavioral changes between baseline and following a brief period of opioid abstinence in 14 patients on long-term opioids.** Blood levels of opioids (Log ROE) were significantly lower after opioid abstinence. Opioid abstinence results in increased withdrawal signs. No changes were observed for pain intensity (paired t-test). NRS = Numerical Rating Scale; ROE = Relative Opioid Equivalents; SOWS = subjective opioid withdrawal scale.

|  | **Baseline**  (mean ± s.d.) | **Abstinence**  (mean ± s.d.) | **T-value** | **p-value** |
| --- | --- | --- | --- | --- |
|  |
| ***Regions that exhibited increased ALFF (CBP+O > CBP-O)*** | | | | |
| ***right pITG*** | 1.04 ± 0.02 | 1.06 ± 0.02 | -1.92 | 0.08 |
| ***left pITG*** | **1.07 ± 0.03** | **1.03 ± 0.03** | **3.39** | **0.004*** |
| ***mPFC*** | 1.01 ± 0.02 | 0.96 ± 0.02 | 1.89 | 0.09 |
| ***right LOC*** | 1.03 ± 0.03 | 1.04 ± 0.03 | -1.28 | 0.15 |
| ***MCL*** | 1.04 ± 0.04 | 1.02 ± 0.03 | 1.22 | 0.24 |
| ***Regions that exhibited decreased ALFF (CBP+O < CBP-O)*** | | | | |
| ***right aMTG*** | **0.99 ± 0.03** | **0.89± 0.04** | **6.78** | **<10-4 *** |
| ***left aMTG*** | 0.96 ± 0.03 | 0.94 ± 0.02 | 1.84 | 0.09 |
| ***left dlPFC*** | 0.97 ± 0.02 | 0.98 ± 0.01 | -0.95 | 0.36 |

**Table S16. Regional ALFF changes, between before and following opioid abstinence, in 14 patients on long-term opioids.**Most brain regions that showed significant ALFF differences between CBP+O and CBP-O showed minimal changes following opioid abstinence. Only the left pITG and right aMTG showed any significant change (paired t-test p<0.05). ALFF = Amplitude of low-frequency fluctuations; pITG = posterior inferior temporal gyrus; mPFC = middle prefrontal cortex; LOC = Lateral occipital cortex; MCL = mesocorticolimbic region; aMTG = anterior middle temporal gyrus; dlPFC = dorsolateral prefrontal cortex. *p<0.05 Bonferroni corrected.

|  | **CBP**  mean ± s.d. |
| --- | --- |
| ***Demographic and general health characteristics*** | |
| Age (years) | 49.33 ± 15.20 |
| Sex/female (%) | 16 (76.19%) |
| ***Pain characteristics*** | |
| Pain intensity (NRS) | 6.71 ± 1.84 |
| Pain duration (years) | 13.51± 11.01 |
| ***Opioid consumption and behavior*** |  |
| MME | 13.81 ± 15.77 |

**Table S17. Patient demographics and general health for patients who underwent 4-week multidisciplinary pain rehabilitation program.** Patients had similar pain intensity and duration as well as age and sex distributions to CBP+O. Patients had lower MME values compared to CBP+O, with highest MME = 51.7. MME = Morphine Milligram Equivalents.

|  | **Tapered (n = 8)** | | **Non-tapered (n = 13)** | | **Treatment**  **Effect**  F-value (P-value) | **Group x Treatment**  **Effect**  F-value (P-value) |
| --- | --- | --- | --- | --- | --- | --- |
|  | **Pre**  (mean ± s.d.) | **Post**  (mean ± s.d.) | **Pre**  (mean ± s.d.) | **Post**  (mean ± s.d.) |
| ***Pain and opioid consumption*** | | | | | | |
| ***Pain intensity (NRS)*** | 7.25 ± 1.39 | 4.88 ± 1.64 | 6.38 ± 2.06 | 4.69 ± 2.62 | **14.33 (0.001)** | 0.40 (0.53) |
| ***MME*** | 23.32 ± 18.10 | 13.11 ± 14.10 | 7.96 ± 11.23 | 8.01 ± 11.10 | **37.00 (<10-6)** | **37.6 (<10-6)** |
| ***Regions that exhibited increased ALFF (CBP+O > CBP-O)*** | | | | | | |
| ***right pITG*** | 0.99 ± 0.02 | 0.99 ± 0.02 | 0.99 ± 0.02 | 0.99 ± 0.02 | 2.89 (0.11) | 0.01 (0.92) |
| ***left pITG*** | 1.03 ± 0.02 | 1.01 ± 0.03 | 1.01 ± 0.02 | 1.00 ± 0.02 | **8.80 (0.007)** | 0.03 (0.87) |
| ***mPFC*** | 0.96 ± 0.01 | 0.96 ± 0.02 | 0.97 ± 0.03 | 0.98 ± 0.03 | 0.01 (0.94) | 0.79 (0.39) |
| ***right LOC*** | 0.98 ± 0.03 | 0.97 ± 0.03 | 1.01 ± 0.02 | 0.99 ± 0.02 | 2.73 (0.11) | 0.34 (0.56) |
| ***MCL*** | 0.98 ± 0.02 | 0.97 ± 0.02 | 0.96 ± 0.02 | 0.96 ± 0.02 | 0.35 (0.56) | 0.00 (0.94) |
| ***Regions that exhibited decreased ALFF (CBP+O < CBP-O)*** | | | | | | |
| ***right aMTG*** | 1.07 ± 0.02 | 1.07 ± 0.02 | 1.07 ± 0.02 | 1.06 ± 0.02 | 1.89 (0.18) | 0.09 (0.77) |
| ***left aMTG*** | 1.05 ± 0.01 | 1.05 ± 0.01 | 1.05 ± 0.02 | 1.04 ± 0.01 | 3.90 (0.06) | 0.02 (0.88) |
| ***left dlPFC*** | 1.04 ± 0.02 | 1.04 ± 0.02 | 1.04 ± 0.02 | 1.04 ± 0.02 | 0.01 (0.98) | 0.11 (0.74) |

**Table S18. Pain intensity, opioid consumption and regional ALFF changes following multidisciplinary pain rehabilitation program in patients who tapered or did not taper opioid use.** Patients were divided into two groups based on changes in their opioid consumption (MME) following treatment (Group1 = tapered, >30% MME decrease following treatment; Group2 = non-tapered < 30% MME decrease following treatment). Out of the 21 patients, 8 tapered their opioid use. Changes in pain, MME and regional ALFF changes were assessed using a repeated measure ANOVA. Pain intensity showed a significant treatment effect, but no group X treatment interaction, indicating that pain intensity decreased similarly for tapered and non-tapered patients. MME showed both a treatment and group x treatment effects. Most brain regions that showed significant ALFF differences between CBP+O and CBP-O showed minimal changes following treatment for tapered and non-tapered groups. Only the left pITG showed a significant treatment effect. No region showed any significant Group x treatment effect. ALFF = Amplitude of low-frequency fluctuations; pITG = posterior inferior temporal gyrus; mPFC = middle prefrontal cortex; LOC = Lateral occipital cortex; MCL = mesocorticolimbic region; aMTG = anterior middle temporal gyrus; dlPFC = dorsolateral prefrontal cortex; MME = Morphine Milligram Equivalents


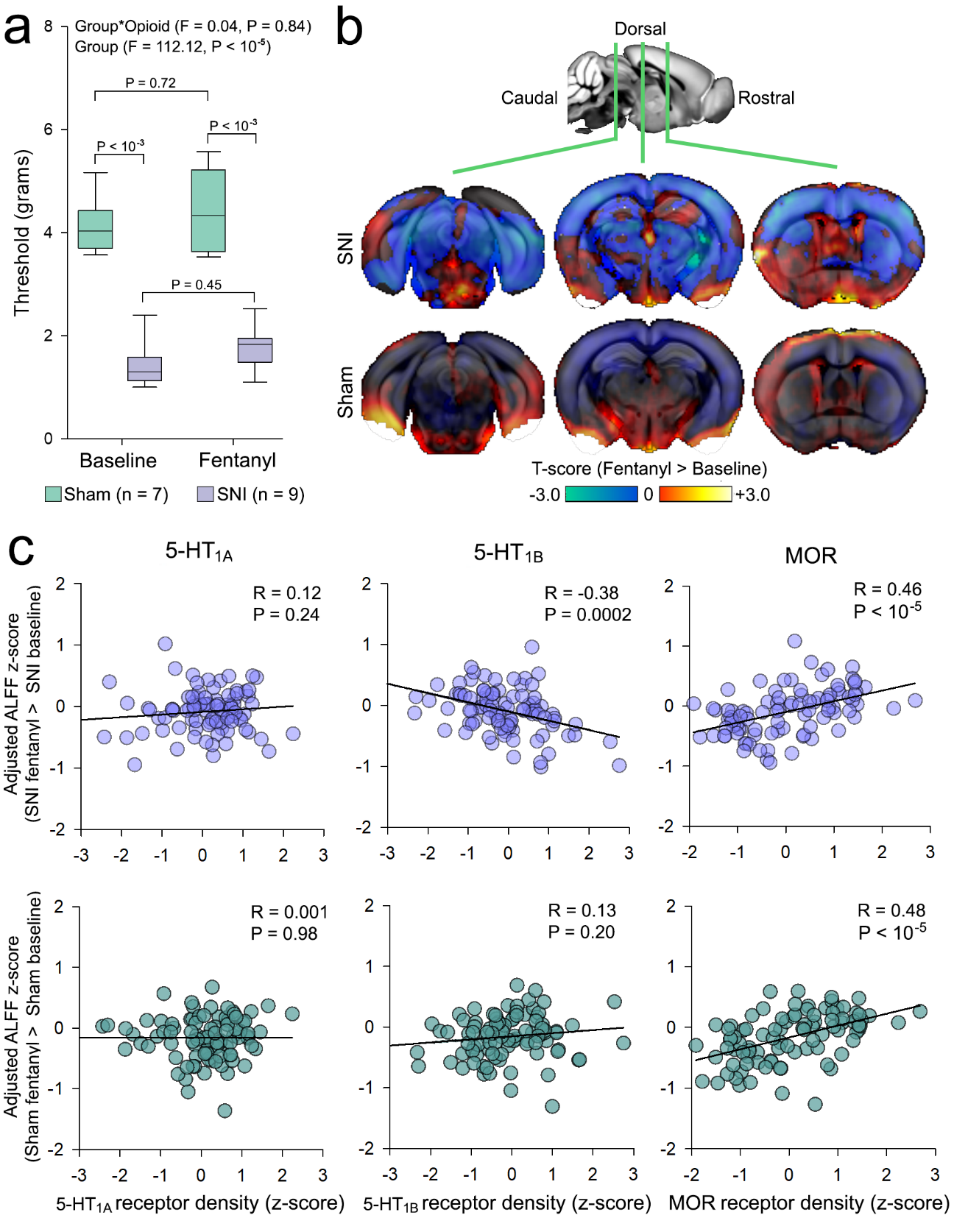


**Figure S6. Modulation of serotonin and opioid dependent brain activity following long-term fentanyl exposure in mouse model for chronic pain. a.** Boxplots display the withdrawal thresholds of the injured paw in SNI and Sham mice at baseline and following long-term exposure to fentanyl. Paw withdraw thresholds were significantly lower in SNI animals compared to sham (P < 10-3) and did not change following fentanyl exposure compared to baseline (P = 0.84). **b.** Brain images show regions that showed increased (red - yellow) and decreased (blue - green) spontaneous activity (change in ALFF) following fentanyl exposure in SNI (top row) and Sham (bottom row). **c.** Scatter plot show relationship between ALFF changes (fentanyl > baseline) with 5-HT1A (left), 5-HT1B (middle) and MOR (right) receptor density for SNI (top row) and sham (bottom row) across 92 brain ROIs. ALFF changes in SNI were negatively correlated with 5-HT1B (P < 10-5) and positively associated with MOR (P < 10-5). ALFF changes in sham were positively associated with MOR (P < 10-5) and not associated with 5-HT1A and 5-HT1B
